# Supplementary material for: Light induced construction of porous covalent organic polymeric networks for significant enhancement of CO2 gas sorption
Source: Royal Society of Chemistry journal article supplement (doi:10.1039/c7ra09538d), 2017-01-01
Supplement: c7ra09538d1.pdf [file c7ra09538d1.pdf]

Supporting Information

**Light Induced Construction of Porous Covalent Organic Polymeric  
Networks for Significant Enhancement of CO<sub>2</sub> Gas Sorption**

Soumitra Bhowmik,<sup>a</sup> Maruthi Konda<sup>a</sup> and Apurba K. Das<sup>\*,a</sup>

Department of Chemistry, Indian Institute of Technology Indore, Indore 453552, India.

\*E-mail: [apurba.das@iiti.ac.in](mailto:apurba.das@iiti.ac.in)

## Table of Content

| S. No. |                                                                                                              | Page No |
|--------|--------------------------------------------------------------------------------------------------------------|---------|
| 1      | <b>Scheme S1</b> Synthetic scheme of compound <b>9</b>                                                       | S3      |
| 2      | <b>Scheme S2</b> Synthetic scheme of compound <b>1</b>                                                       | S3      |
| 3      | <b>Scheme S3</b> Synthetic scheme of compound <b>2</b>                                                       | S4      |
| 4      | <b>Fig. S1</b> SEM images of compound <b>1</b> (a) before UV irradiation, (b) at 60 min of UV irradiation    | S5      |
| 5      | <b>Fig. S2</b> SEM images of compound <b>1</b> (a) before UV irradiation and (d) at 60 min of UV irradiation | S5      |
| 6      | <b>Fig. S3</b> SEM images of compound <b>2</b> (a) before UV reaction and (e) after 60 min of UV irradiation | S5      |
| 7      | <b>Fig. S4</b> TGA curves for compound <b>1</b> , polymer <b>1</b> , compound <b>2</b> and polymer <b>2</b>  | S6      |
| 8      | <b>Fig. S5</b> <sup>1</sup> H NMR spectrum (400 MHz, CDCl <sub>3</sub> ) of compound <b>6</b>                | S7      |
| 19     | <b>Fig. S6</b> <sup>1</sup> H NMR spectrum (400 MHz, CDCl <sub>3</sub> ) of compound <b>7</b>                | S7      |
| 10     | <b>Fig. S7</b> <sup>1</sup> H NMR spectrum (400 MHz, CDCl <sub>3</sub> ) of compound <b>8</b>                | S8      |
| 11     | <b>Fig. S8</b> <sup>1</sup> H NMR spectrum (400 MHz, DMSO- <i>d</i> <sub>6</sub> ) of compound <b>9</b>      | S8      |
| 12     | <b>Fig. S9</b> <sup>1</sup> H NMR spectrum (400 MHz, CDCl <sub>3</sub> ) of compound <b>10</b>               | S9      |
| 13     | <b>Fig. S10</b> <sup>13</sup> C NMR spectrum (100 MHz, CDCl <sub>3</sub> ) of compound <b>10</b>             | S9      |
| 14     | <b>Fig. S11</b> <sup>1</sup> H NMR spectrum (400 MHz, DMSO- <i>d</i> <sub>6</sub> ) of compound <b>11</b>    | S10     |
| 15     | <b>Fig. S12</b> <sup>1</sup> H NMR spectrum (400 MHz, CDCl <sub>3</sub> ) of compound <b>12</b>              | S10     |
| 16     | <b>Fig. S13</b> <sup>13</sup> C NMR spectrum (100 MHz, CDCl <sub>3</sub> ) of compound <b>12</b>             | S11     |
| 17     | <b>Fig. S14</b> <sup>1</sup> H NMR spectrum (400 MHz, DMSO- <i>d</i> <sub>6</sub> ) of compound <b>1</b>     | S11     |
| 18     | <b>Fig. S15</b> <sup>13</sup> C NMR spectrum (100 MHz, DMSO- <i>d</i> <sub>6</sub> ) of compound <b>1</b>    | S12     |
| 19     | <b>Fig. S16</b> <sup>1</sup> H NMR spectrum (400 MHz, DMSO- <i>d</i> <sub>6</sub> ) of compound <b>13</b>    | S12     |
| 20     | <b>Fig. S17</b> <sup>13</sup> C NMR spectrum (100 MHz, DMSO- <i>d</i> <sub>6</sub> ) of compound <b>13</b>   | S13     |
| 21     | <b>Fig. S18</b> <sup>1</sup> H NMR spectrum (400 MHz, DMSO- <i>d</i> <sub>6</sub> ) of compound <b>2</b>     | S13     |
| 22     | <b>Fig. S19</b> <sup>13</sup> C NMR spectrum (100 MHz, DMSO- <i>d</i> <sub>6</sub> ) of compound <b>2</b>    | S14     |
| 23     | <b>Fig. S20</b> ESI-MS spectrum of compound <b>8</b>                                                         | S14     |
| 24     | <b>Fig. S21</b> ESI-MS spectrum of compound <b>10</b>                                                        | S14     |
| 25     | <b>Fig. S22</b> ESI-MS spectrum of compound <b>11</b>                                                        | S15     |
| 26     | <b>Fig. S23</b> ESI-MS spectrum of compound <b>12</b>                                                        | S15     |
| 27     | <b>Fig. S24</b> ESI-MS spectrum of compound <b>1</b>                                                         | S15     |
| 28     | <b>Fig. S25</b> ESI-MS spectrum of compound <b>13</b>                                                        | S16     |
| 29     | <b>Fig. S26</b> ESI-MS spectrum of compound <b>2</b>                                                         | S16     |

## 1. Synthesis of diphenylbutadiyne containing peptide bolaamphiphiles:

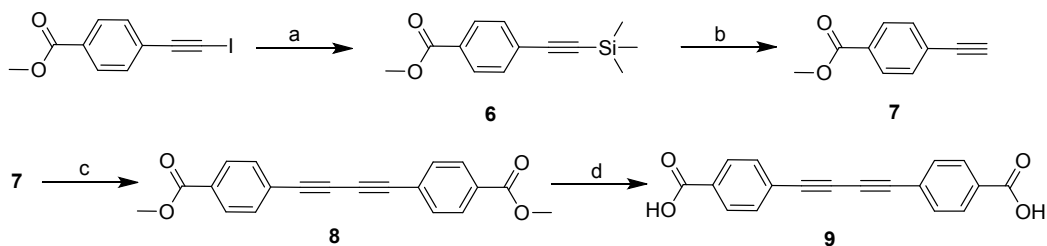

*Reagents and conditions:* (a) TMSA, Pd(PPh<sub>3</sub>)<sub>2</sub>Cl<sub>2</sub>, CuI, Et<sub>3</sub>N, 80 °C; (b) K<sub>2</sub>CO<sub>3</sub>/MeOH, rt; (c) CuCl/TMEDA, acetone, rt; (d) NaOH/THF, reflux.

### Scheme S1 Synthetic scheme of 4,4'-(buta-1,3-diyne-1,4-diyl)dibenzoic acid **9**.

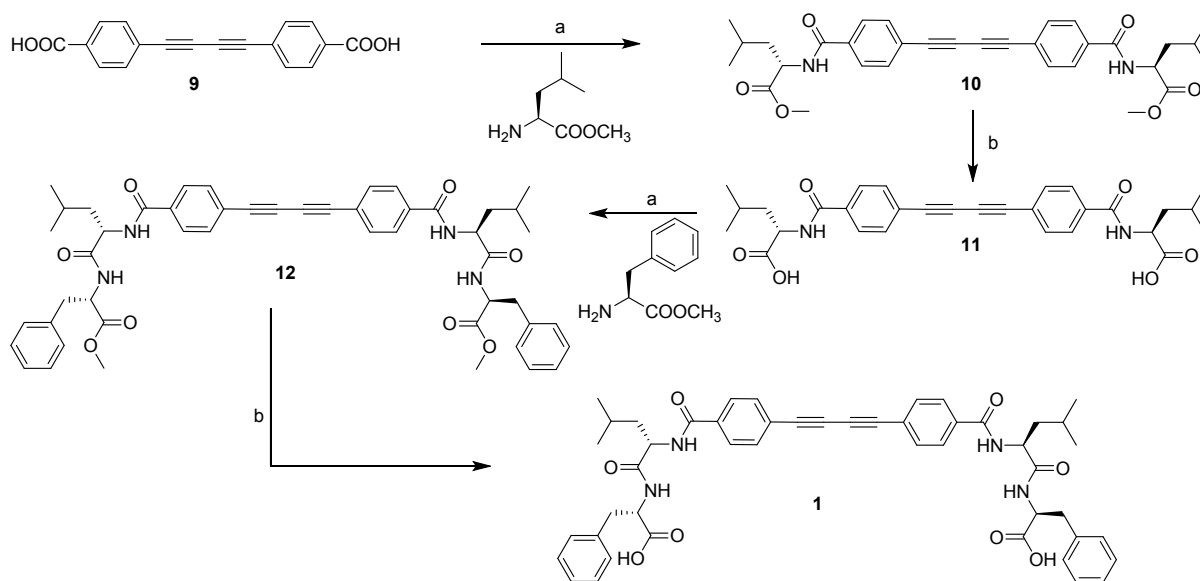

*Reagents and conditions:* (a) DCC, HOBt, DMF; (b) 2N NaOH, MeOH.

### Scheme S2 Synthetic scheme of compound **1**.

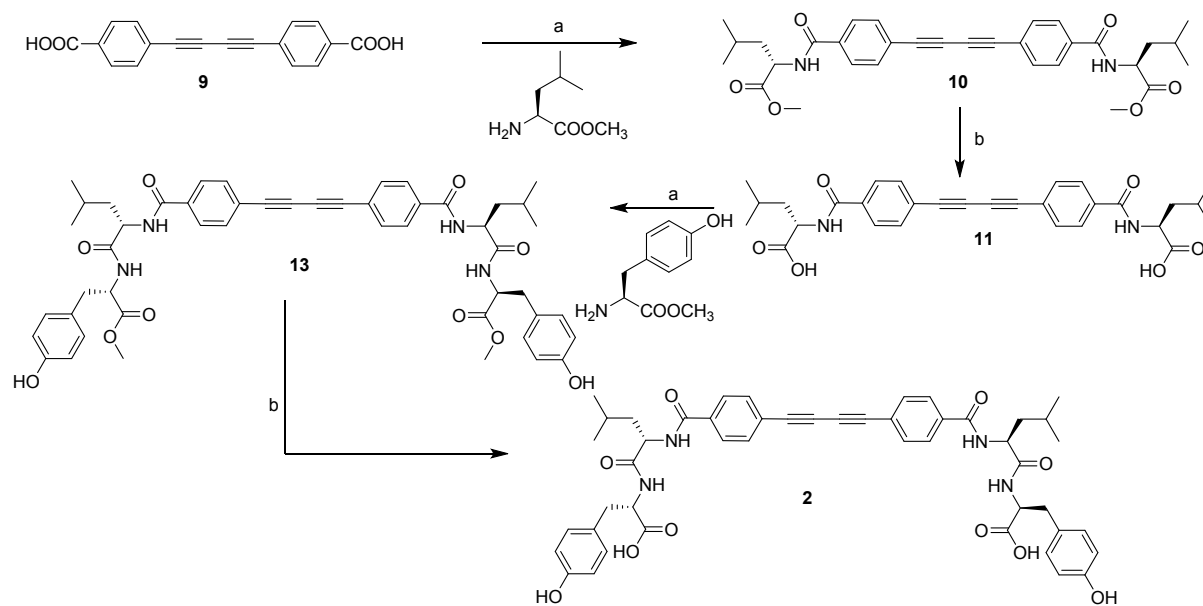

*Reagents and conditions:* (a) DCC, HOBT, DMF; (b) 2N NaOH, MeOH.

**Scheme S3** Synthetic scheme of compound **2**.

## 2. Morphological Study:

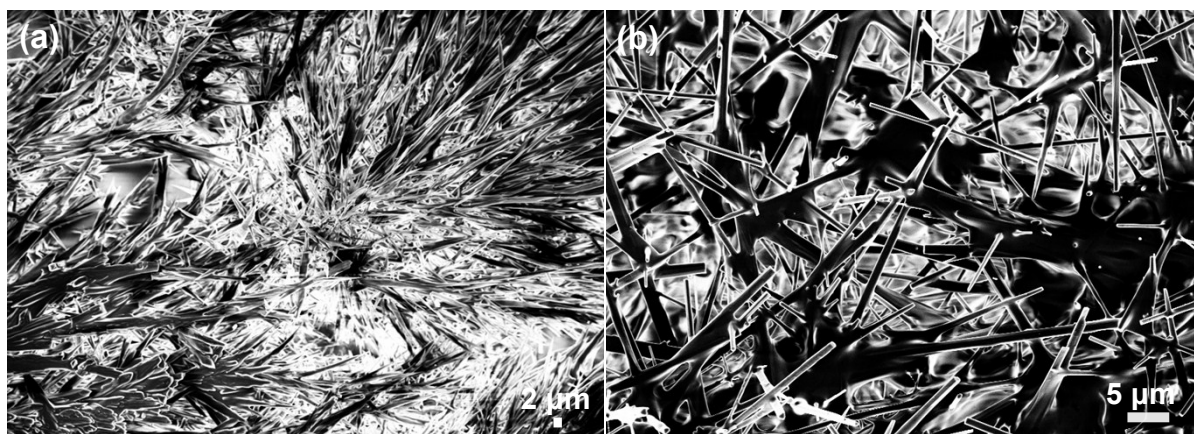

**Fig. S1** SEM images of compound **1** (a) before UV irradiation, (b) at 60 min of UV irradiation. ( $C = 15 \text{ mmol L}^{-1}$ )

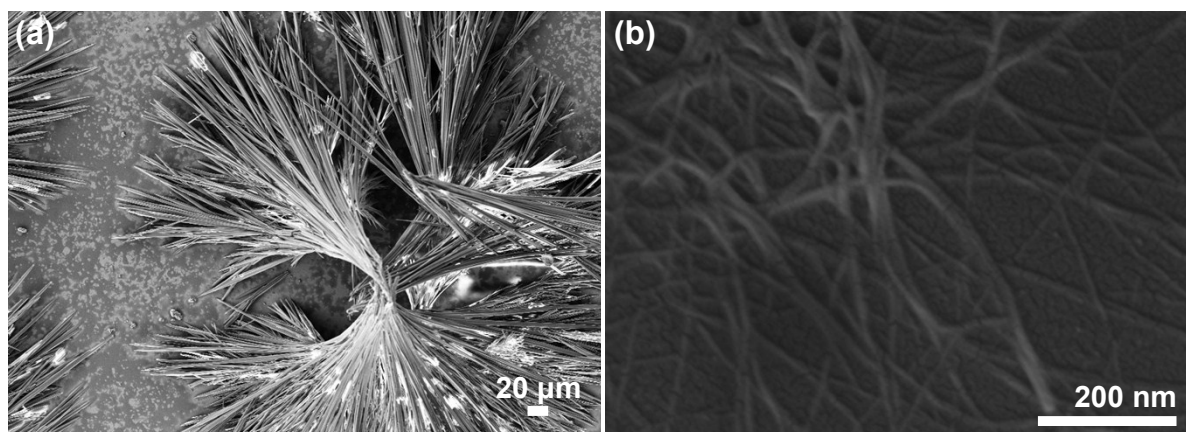

**Fig. S2** SEM images of compound **1** (a) before UV irradiation and (d) at 60 min of UV irradiation. ( $C = 30 \text{ mmol L}^{-1}$ ).

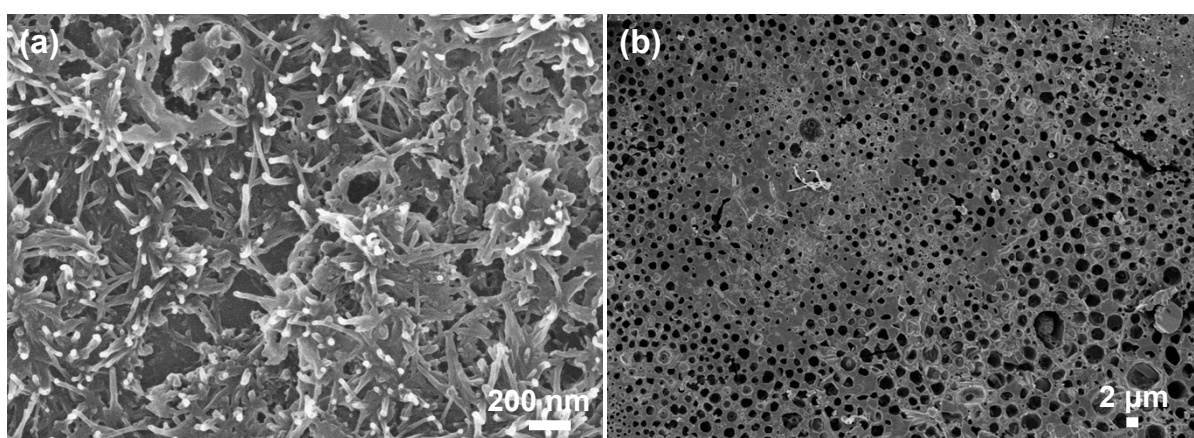

**Fig. S3** SEM images of compound **2** (a) before UV reaction and (e) after 60 min of UV irradiation. ( $C = 20 \text{ mmol L}^{-1}$ )

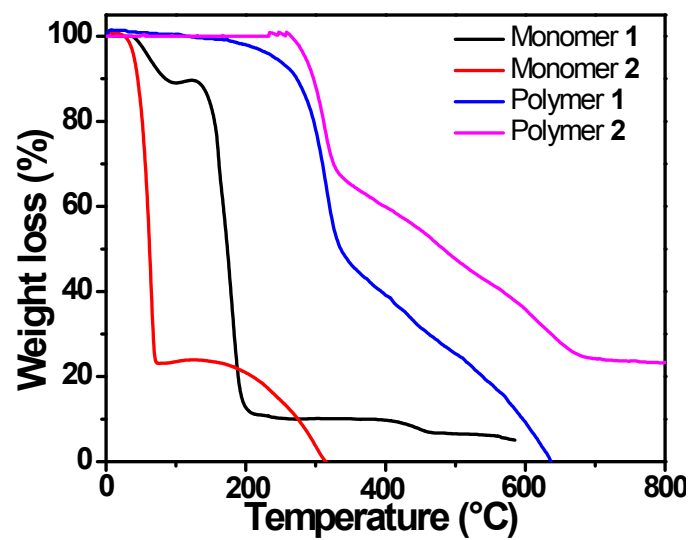

**Fig. S4** TGA curves for compound 1, polymer 1, compound 2 and polymer 2.

### 3. NMR Spectra of all synthesized compounds:

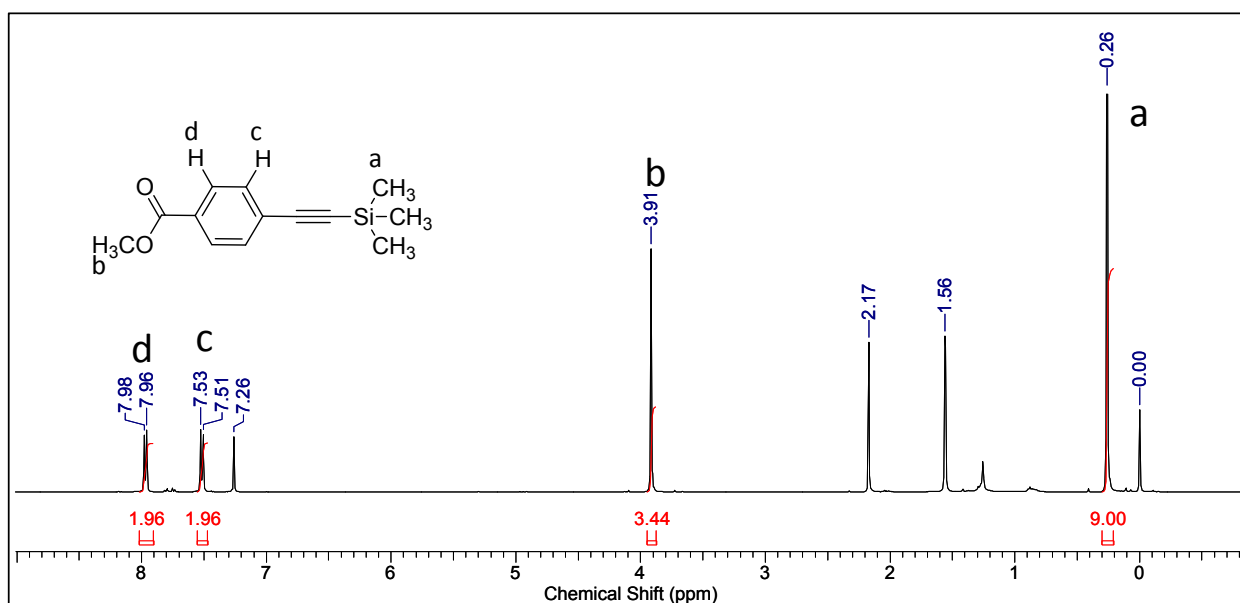

**Fig. S5** <sup>1</sup>H NMR spectrum (400 MHz, CDCl<sub>3</sub>) of compound 6.

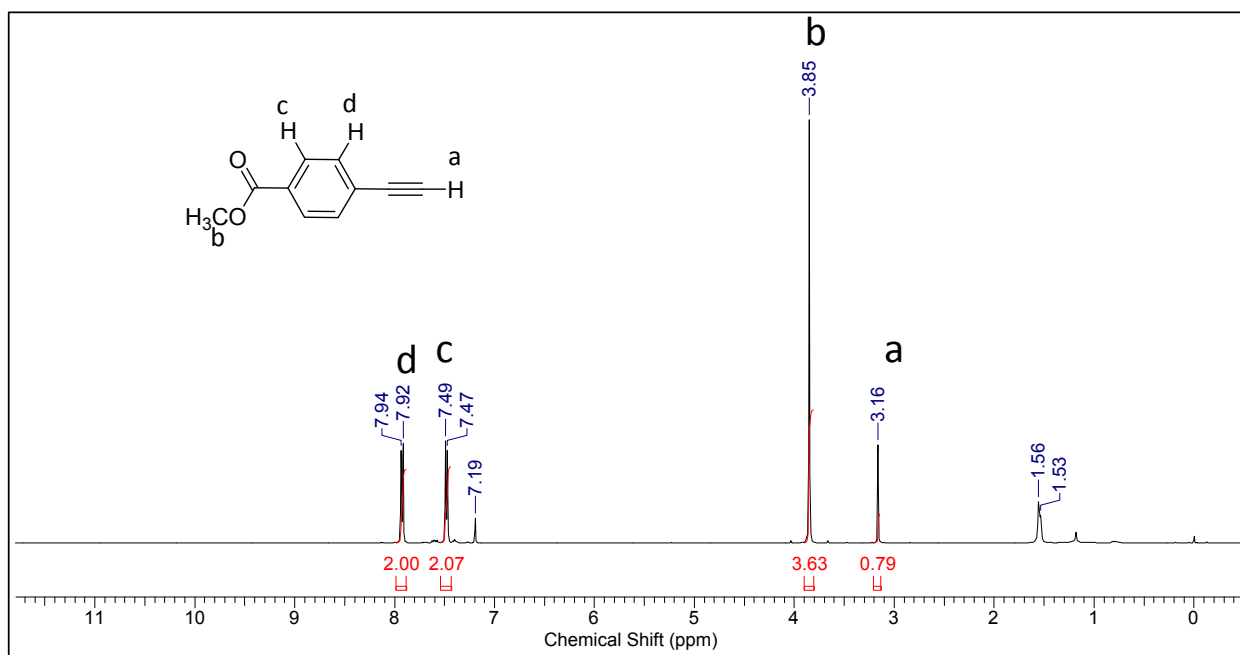

**Fig. S6** <sup>1</sup>H NMR spectrum (400 MHz, CDCl<sub>3</sub>) of compound 7.

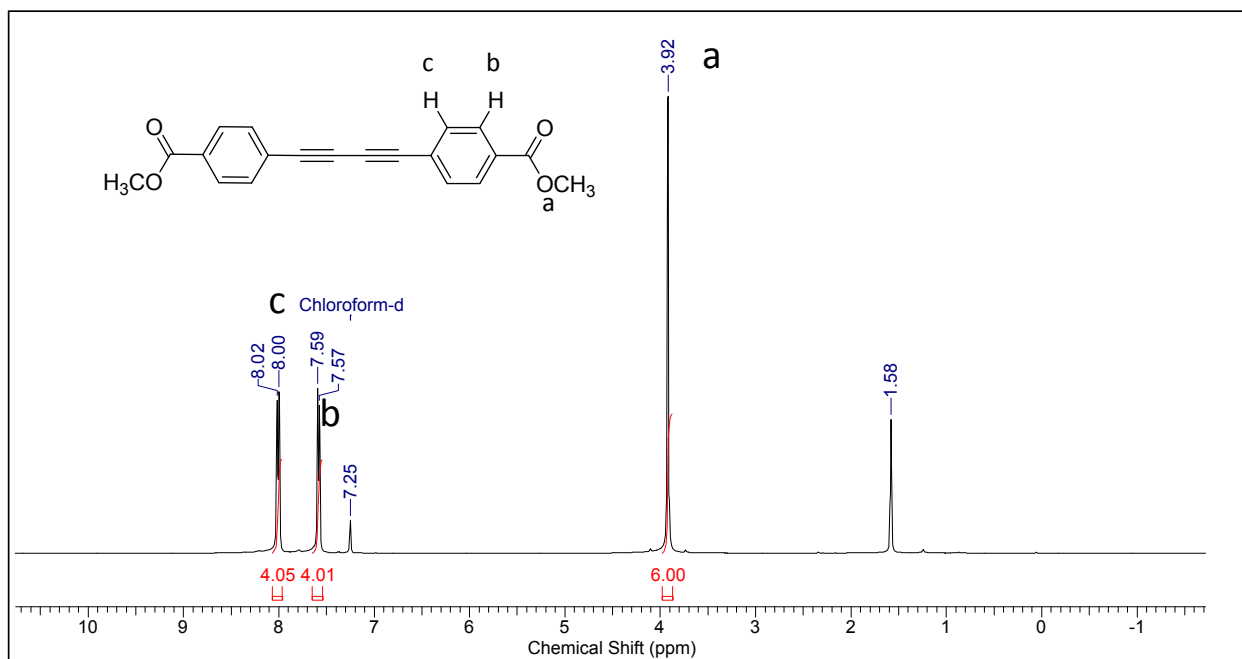

**Fig. S7** <sup>1</sup>H NMR spectrum (400 MHz, CDCl<sub>3</sub>) of compound **8**.

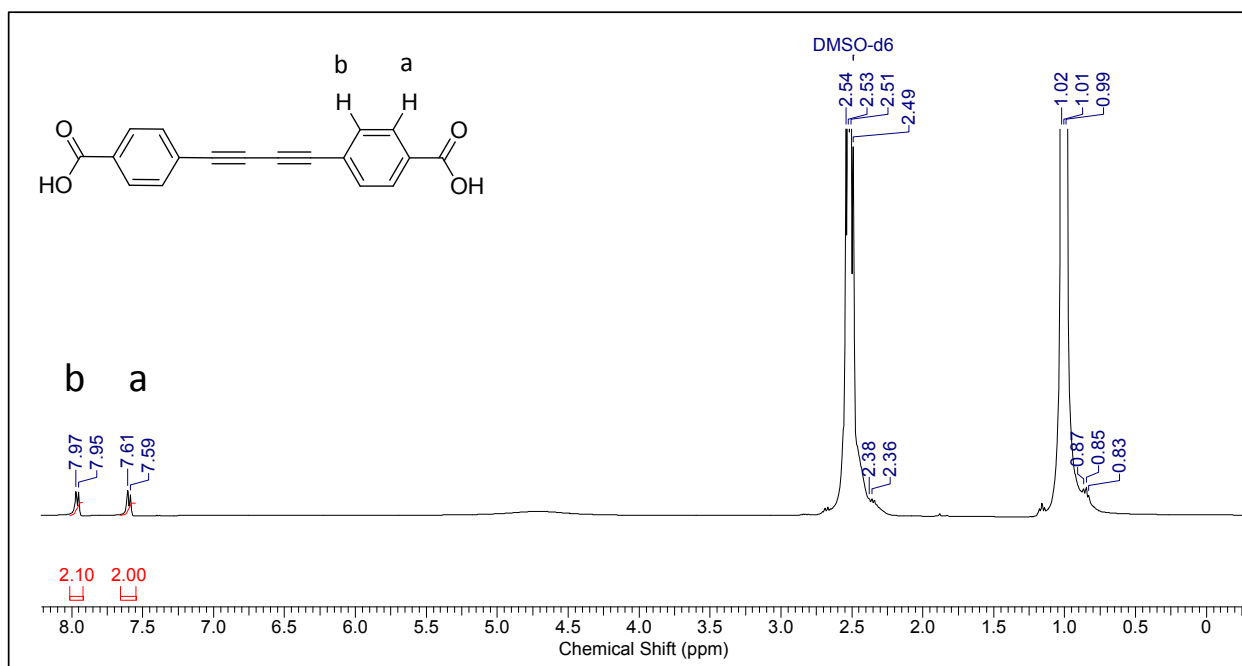

**Fig. S8** <sup>1</sup>H NMR spectrum (400 MHz, DMSO-*d*<sub>6</sub>) of compound **9**.



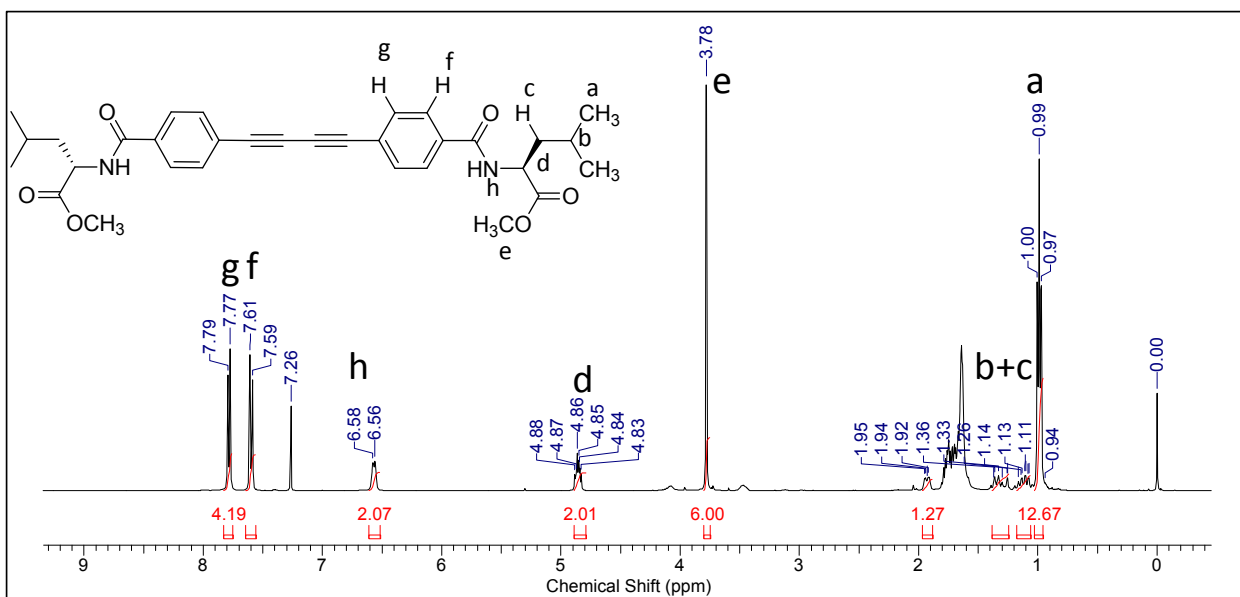

**Fig. S9**  $^1\text{H}$  NMR spectrum (400 MHz,  $\text{CDCl}_3$ ) of compound 10.

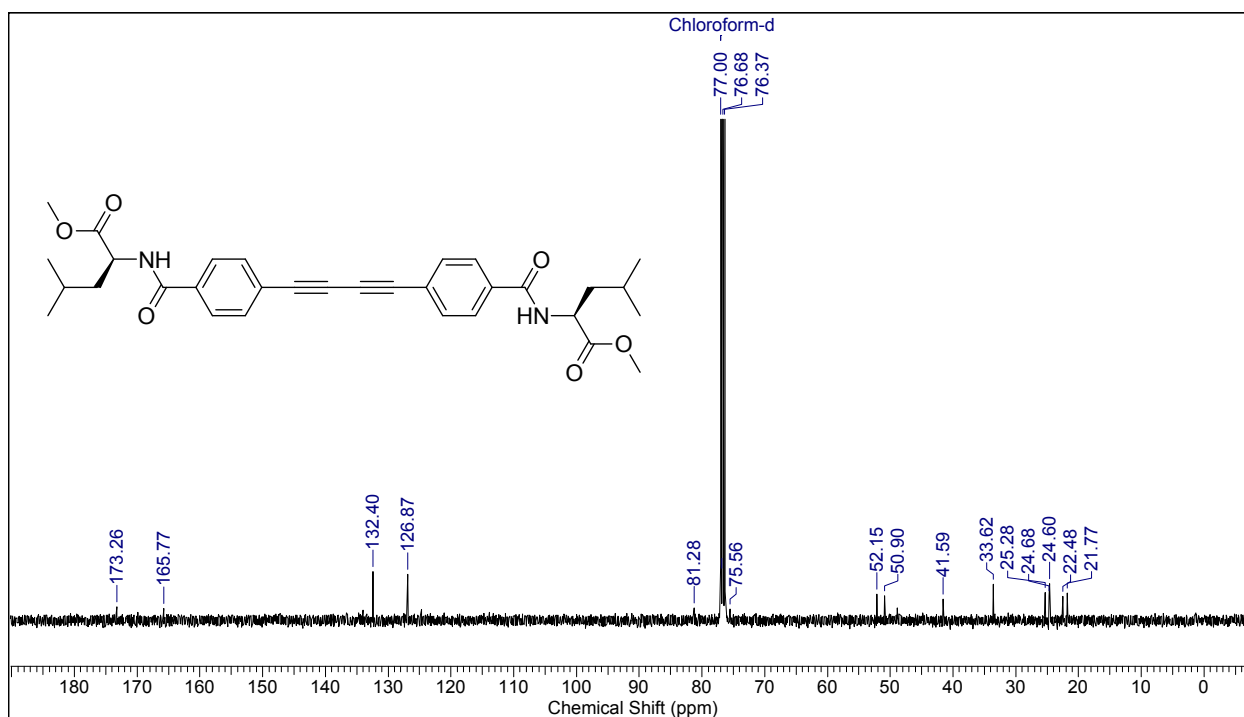

**Fig. S10**  $^{13}\text{C}$  NMR spectrum (100 MHz,  $\text{CDCl}_3$ ) of compound 10.

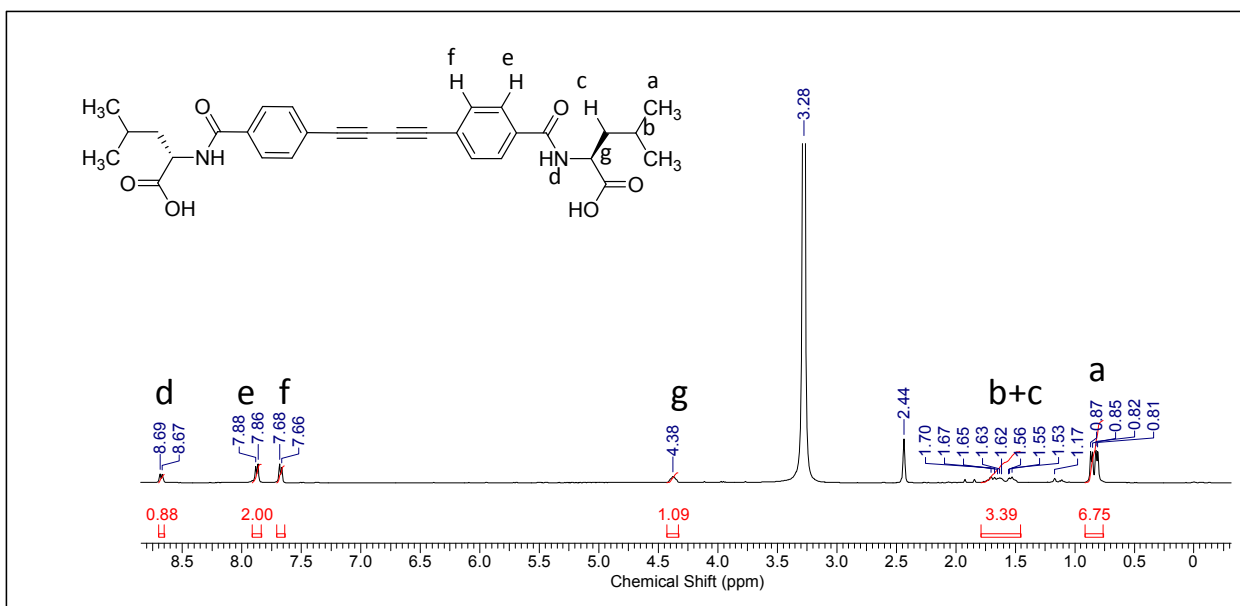

**Fig. S11**  $^1\text{H}$  NMR spectrum (400 MHz,  $\text{DMSO}-d_6$ ) of compound 11.

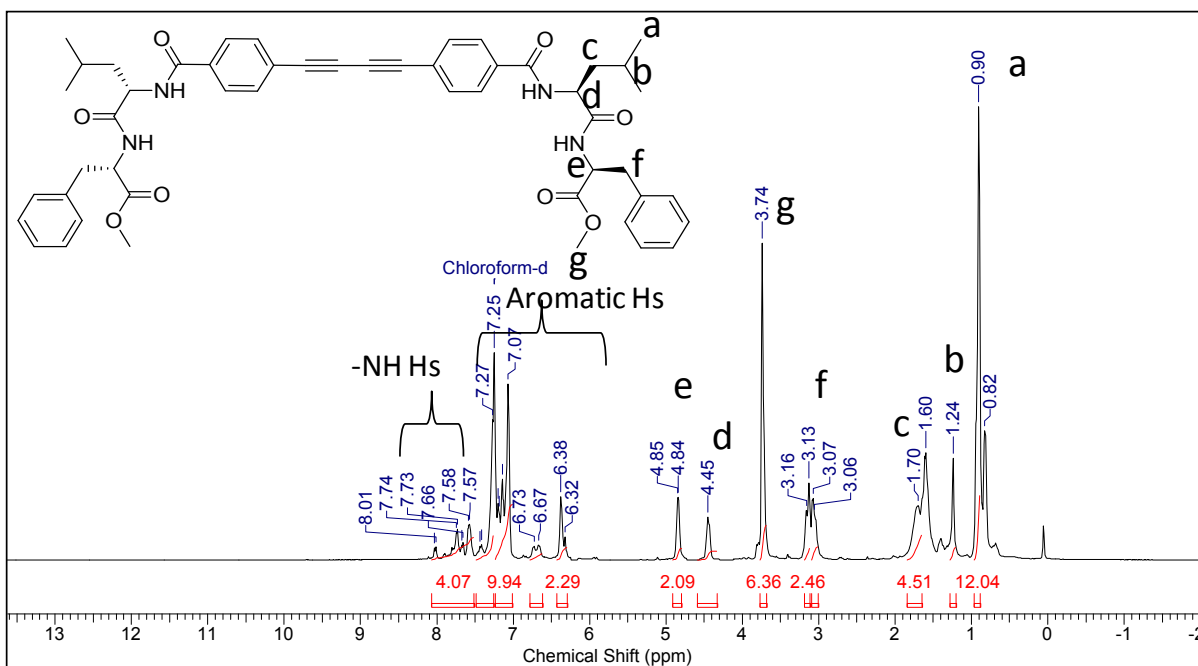

**Fig. S12**  $^1\text{H}$  NMR spectrum (400 MHz,  $\text{CDCl}_3$ ) of compound 12.

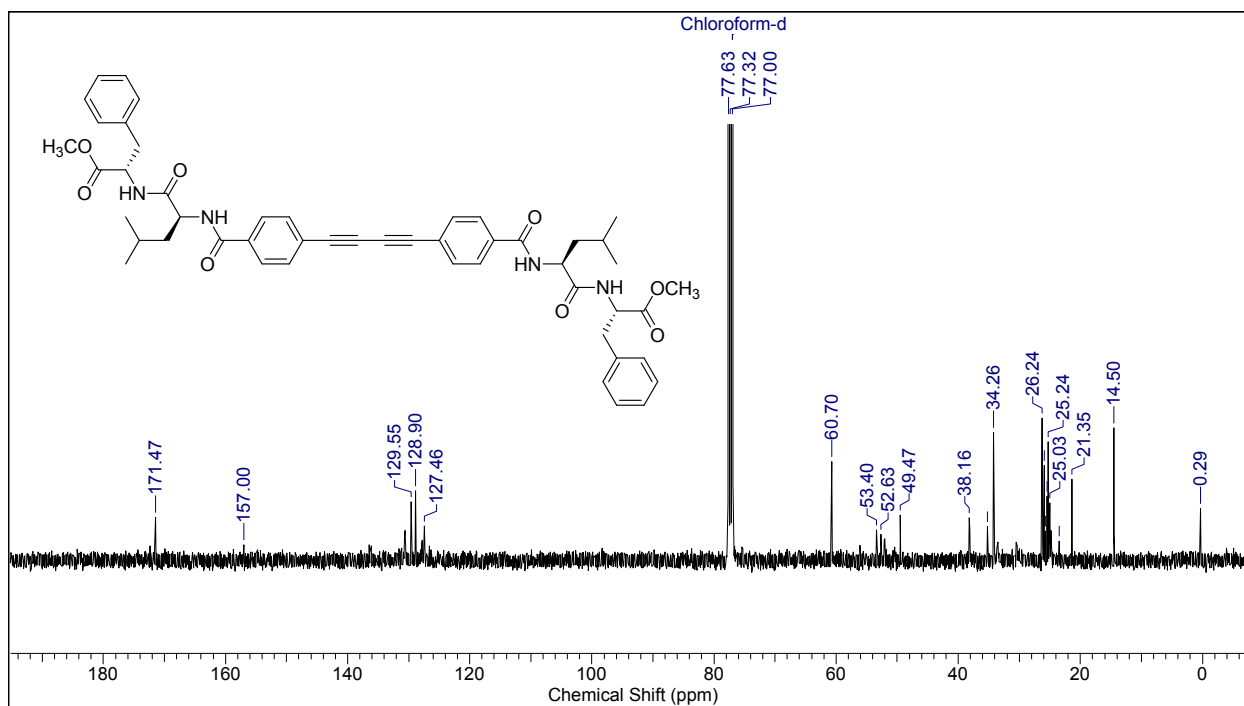

**Fig. S13**  $^{13}\text{C}$  NMR spectrum (100 MHz,  $\text{CDCl}_3$ ) of compound **12**.

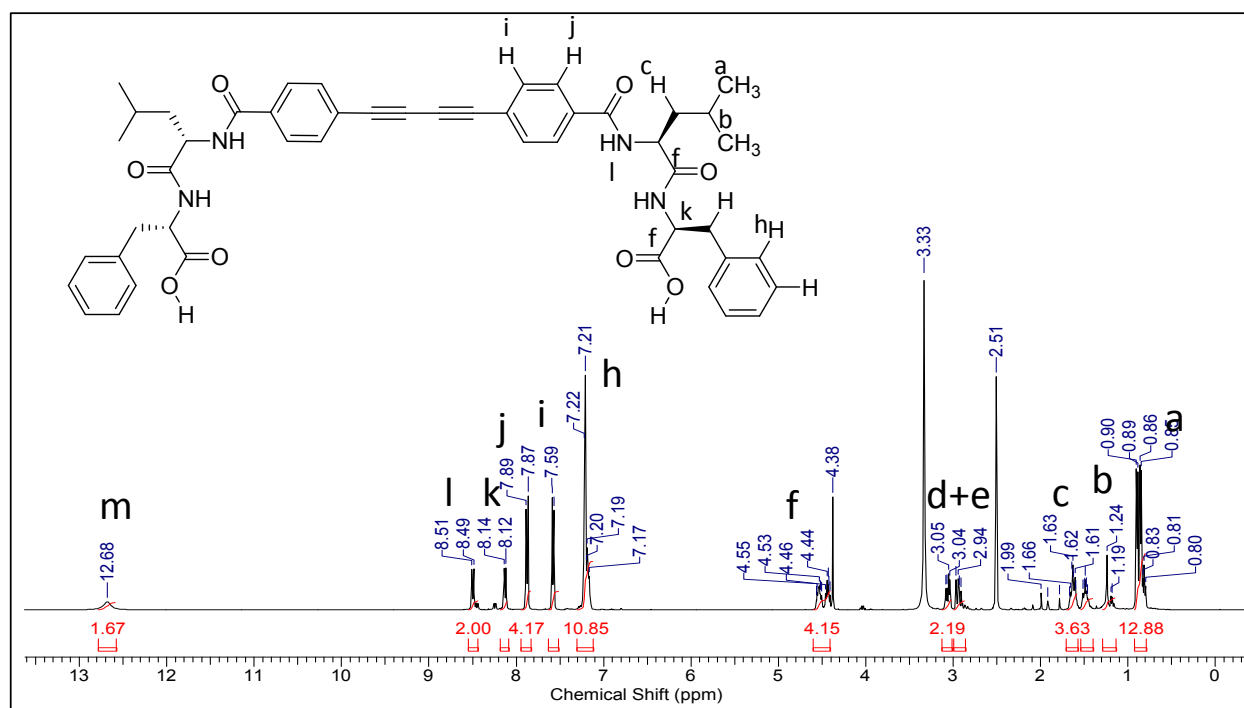

**Fig. S14**  $^1\text{H}$  NMR spectrum (400 MHz,  $\text{DMSO}-d_6$ ) of compound **1**.

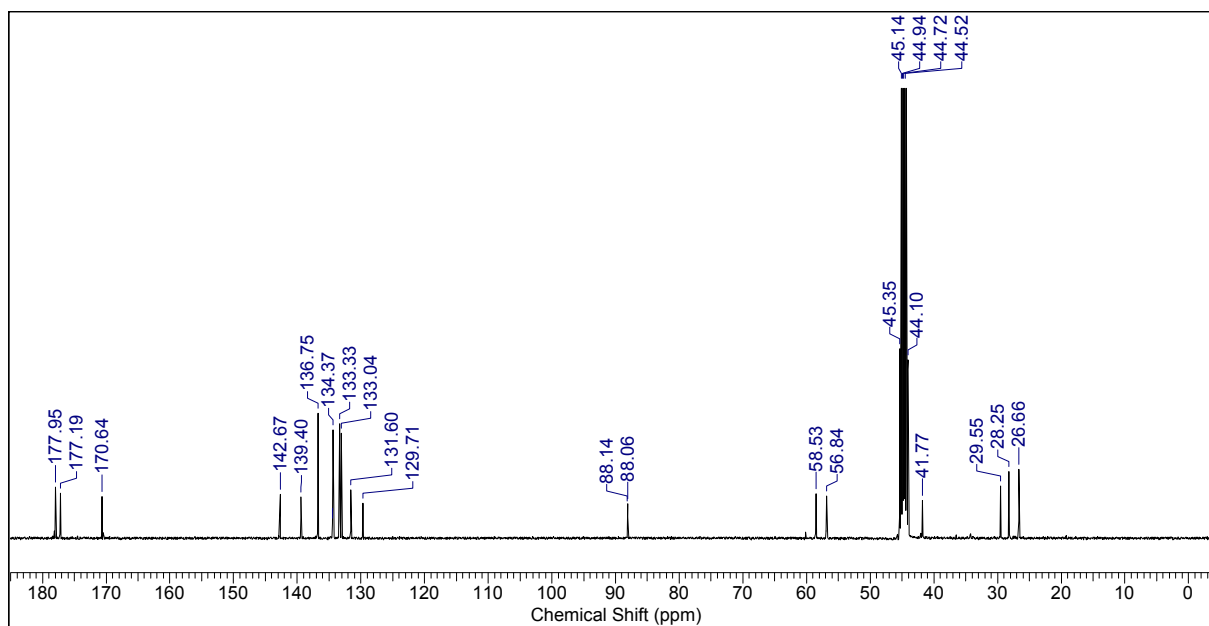

**Fig. S15**  $^{13}\text{C}$  NMR spectrum (100 MHz,  $\text{DMSO-}d_6$ ) of compound **1**.

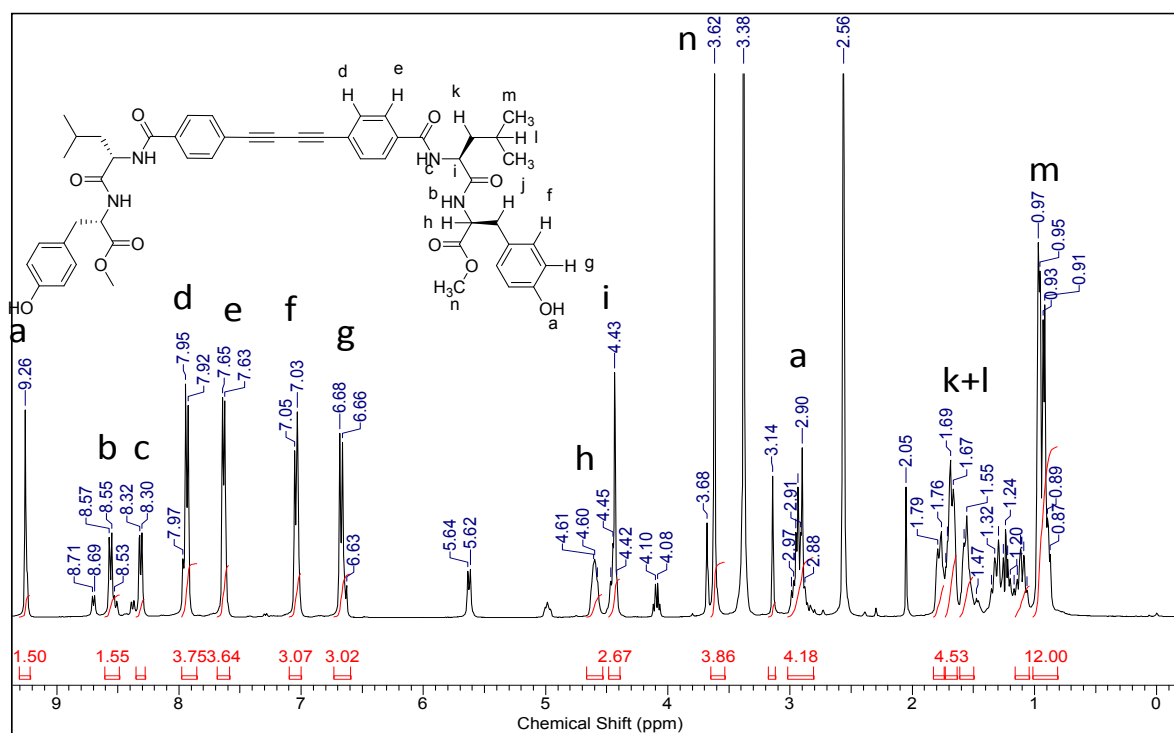

**Fig. S16**  $^1\text{H}$  NMR spectrum (400 MHz,  $\text{DMSO-}d_6$ ) of compound **13**.

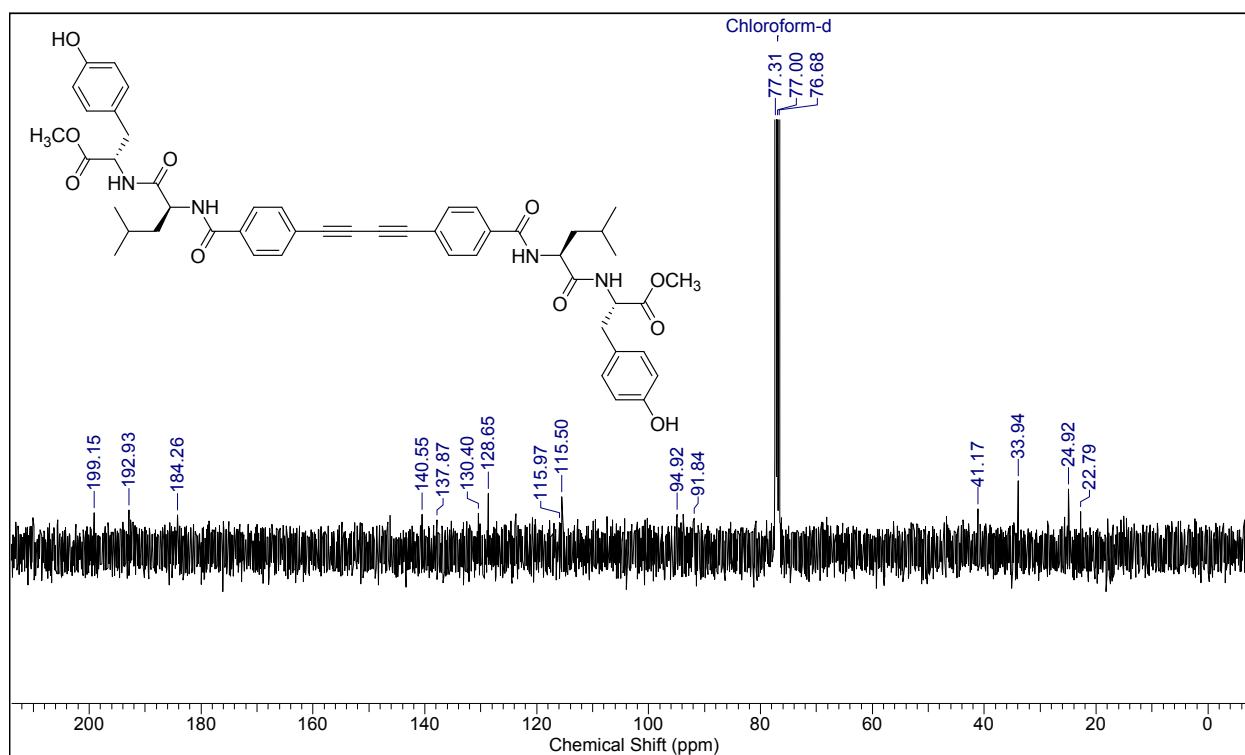

Fig. S17  $^{13}\text{C}$  NMR spectrum (100 MHz,  $\text{DMSO}-d_6$ ) of compound **13**.

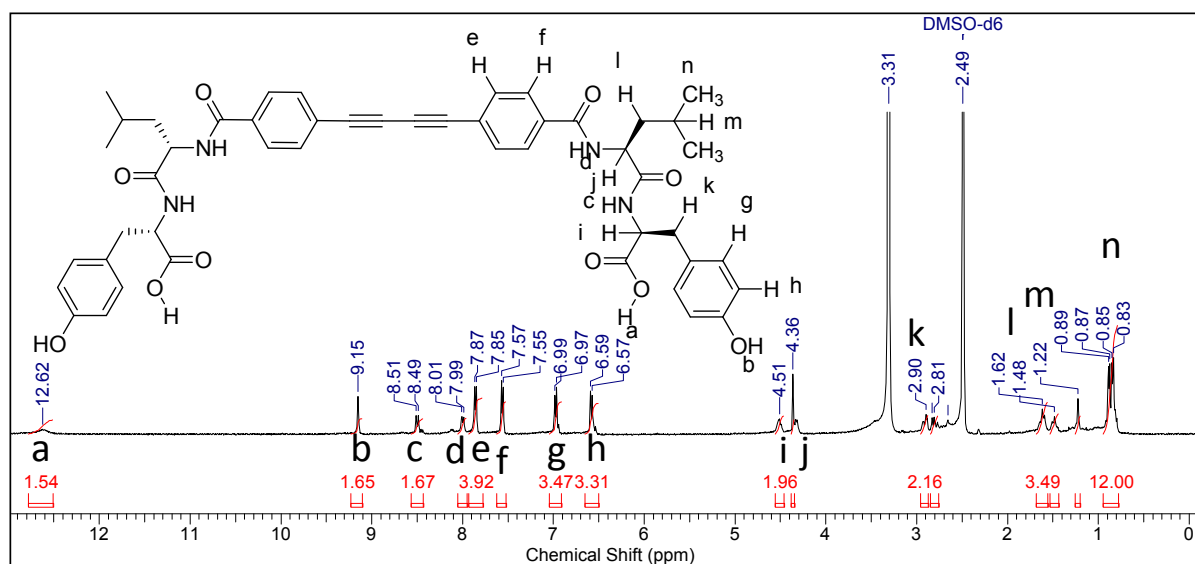

Fig. S18  $^1\text{H}$  NMR spectrum (400 MHz,  $\text{DMSO}-d_6$ ) of compound **2**.

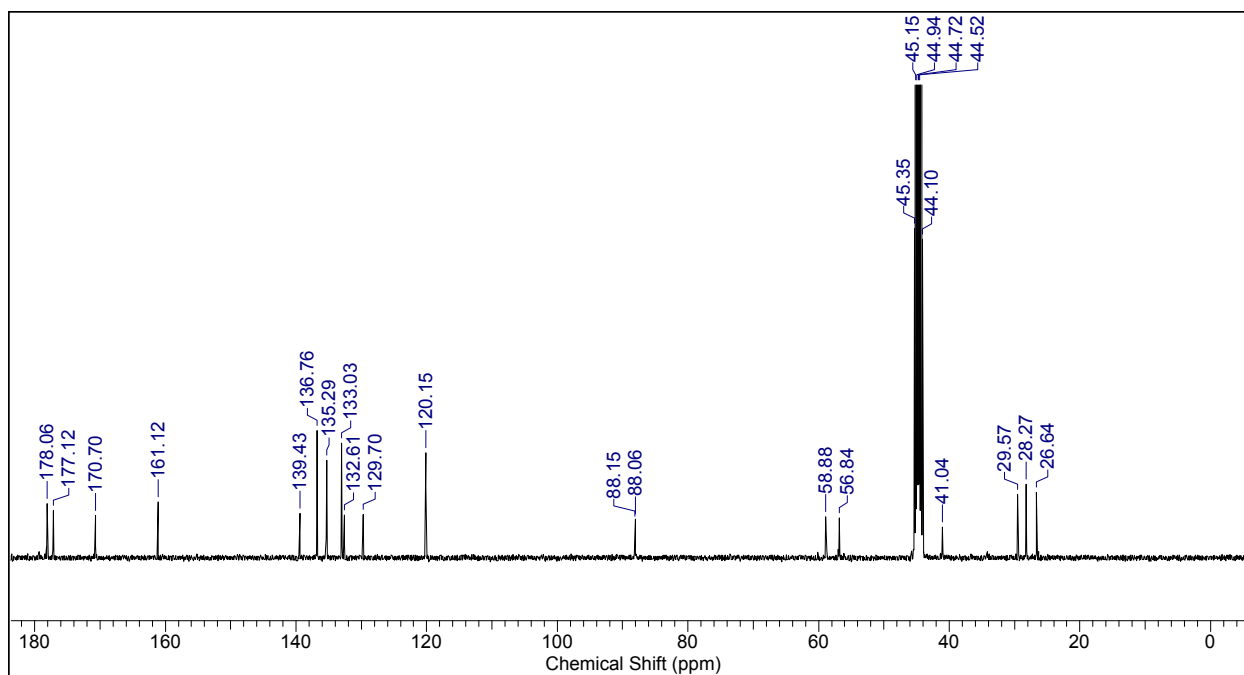

**Fig. S19**  $^{13}\text{C}$  NMR spectrum (100 MHz,  $\text{DMSO-}d_6$ ) of compound **2**.

#### 4. Mass Spectra of all synthesized compounds:

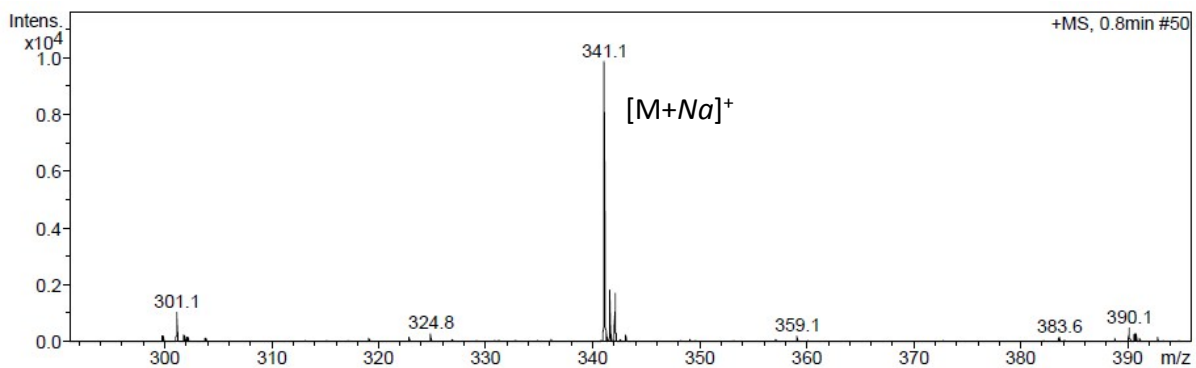

**Fig. S20** ESI-MS spectrum of compound **8**.

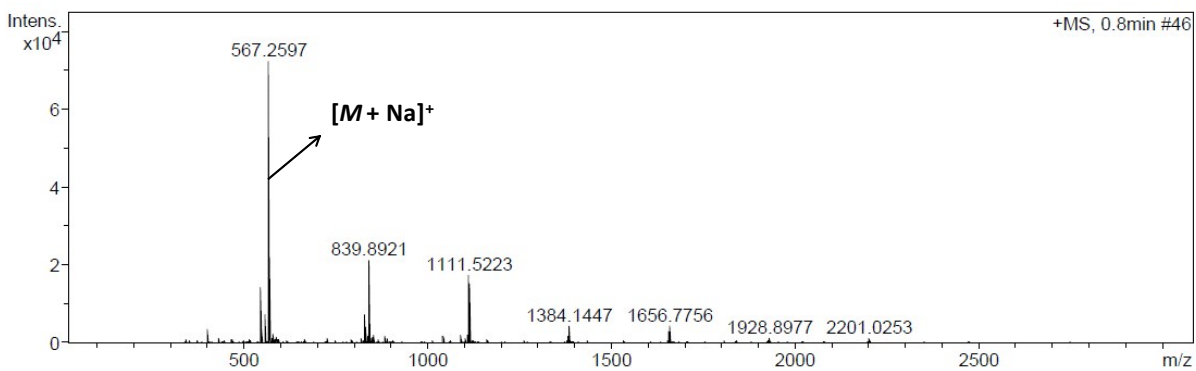

**Fig. S21** ESI-MS spectrum of compound **10**.

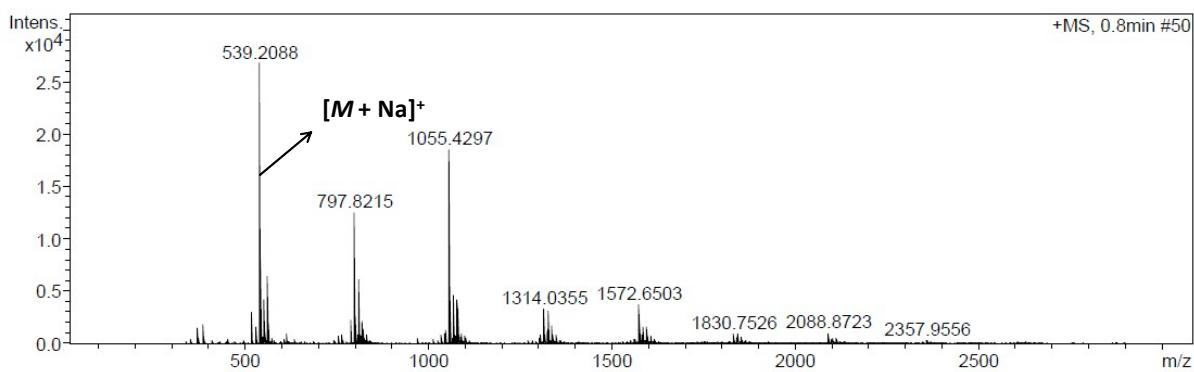

**Fig. S22** ESI-MS spectrum of compound 11.

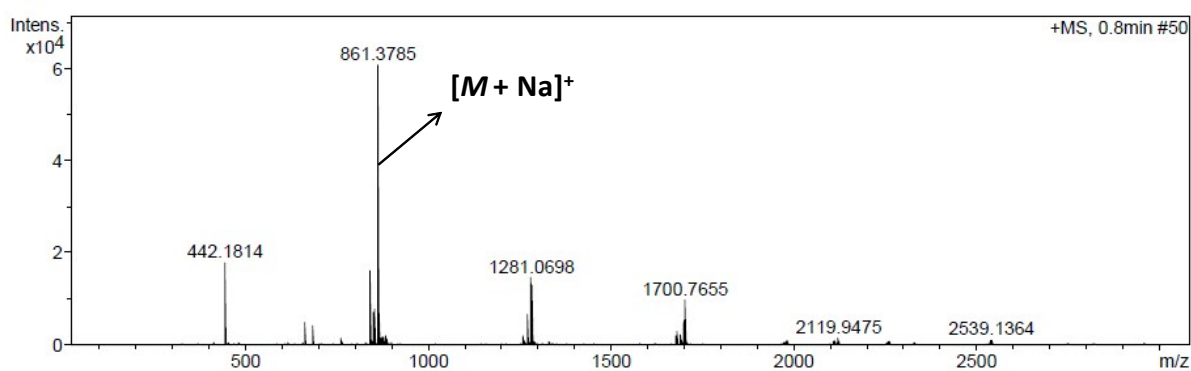

**Fig. S23** ESI-MS spectrum of compound 12.

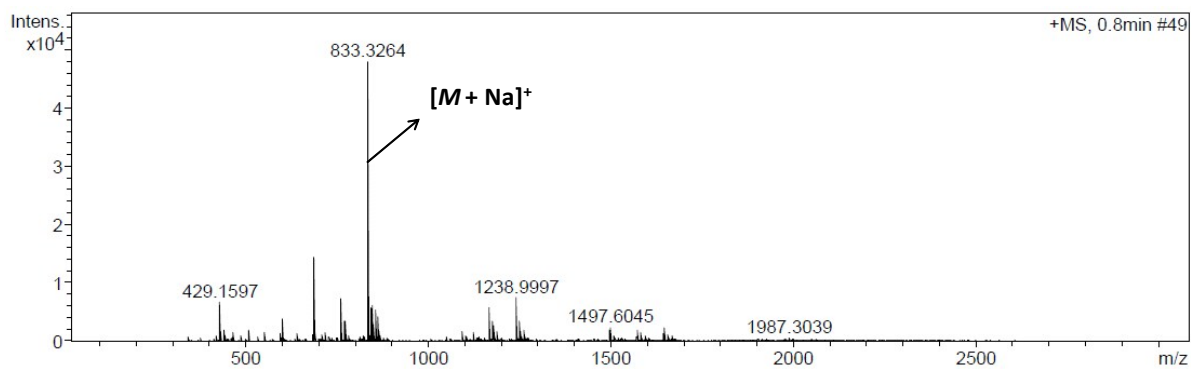

**Fig. S24** ESI-MS spectrum of compound 1.

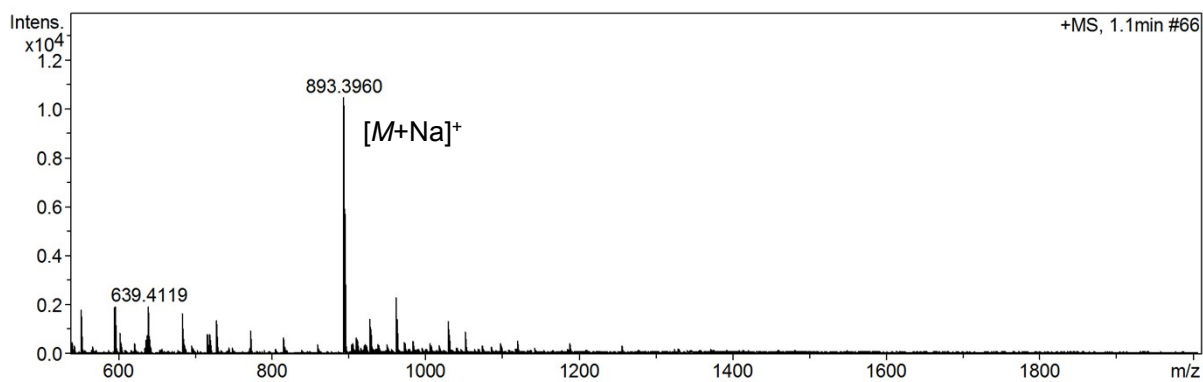

**Fig. S25** ESI-MS spectrum of compound 13.

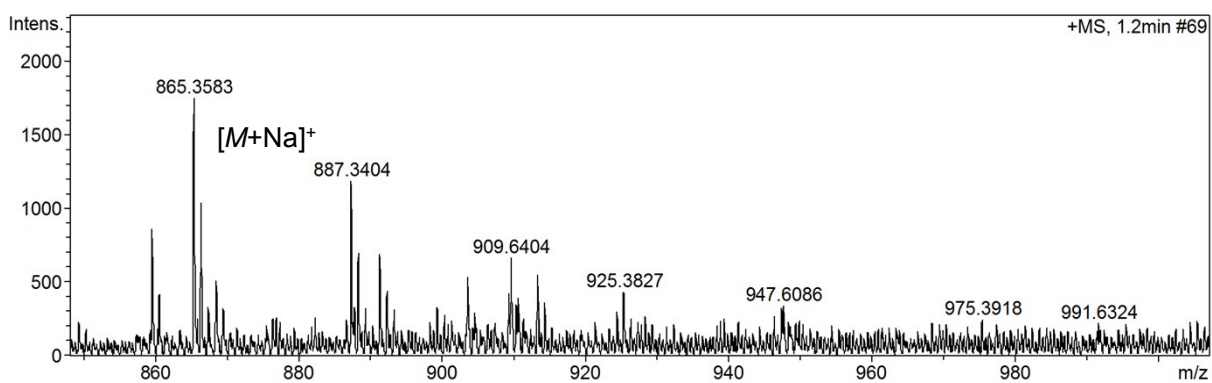

**Fig. S26** ESI-MS spectrum of compound 2.
